# Supplementary material for: Heritability of Radiation Response in Lung Cancer Families
Source: PubMed Central journal article supplement (PMC3899950; doi:10.3390/genes3020248), 2012-03-29
Supplement: genes-03-00248-s001.pdf [file genes-03-00248-s001.pdf]

Article

## Heritability of Radiation Induced DNA Damage Response in Lung Cancer Families

Albert Rosenberger <sup>1,\*</sup>, Ute Rössler <sup>2</sup>, Sabine Hornhardt <sup>2</sup>, Wiebke Sauter <sup>2</sup>, Heike Bickeböller <sup>1</sup>, H.-Erich Wichmann <sup>3,4</sup> and Maria Gomolka <sup>2</sup>

### Supplementary Material

**Table 1.** Characteristics of study participants.

|                                          |                                      | Parents<br>(n = 180) |             |          | Siblings<br>(n = 276) |             |          | Partners<br>(n = 63) |             |          | Probands<br>(n = 177) |             |          | Offspring<br>(n = 104) |             |          |
|------------------------------------------|--------------------------------------|----------------------|-------------|----------|-----------------------|-------------|----------|----------------------|-------------|----------|-----------------------|-------------|----------|------------------------|-------------|----------|
|                                          |                                      | N                    |             | N        |                       | N           |          | N                    |             | N        |                       | N           |          | N                      |             |          |
| <b>Sex</b>                               | <i>unknown</i>                       | 9                    | 5%          | 8        | 3%                    |             |          |                      |             | 4        | 1%                    | 3           | 3%       |                        |             |          |
|                                          | <i>male</i>                          | 65                   | 36%         | 121      | 44%                   | 22          | 35%      | 99                   | 57%         | 51       | 49%                   |             |          |                        |             |          |
|                                          | <i>female</i>                        | 106                  | 59%         | 147      | 53%                   | 41          | 65%      | 74                   | 42%         | 50       | 48%                   |             |          |                        |             |          |
|                                          |                                      | <i>N</i>             | <i>mean</i> | <i>s</i> | <i>N</i>              | <i>mean</i> | <i>s</i> | <i>N</i>             | <i>mean</i> | <i>s</i> | <i>N</i>              | <i>mean</i> | <i>s</i> | <i>N</i>               | <i>mean</i> | <i>s</i> |
| <b>Age</b>                               |                                      | 171                  | 69.3        | 6.3      | 270                   | 44.6        | 7.7      | 63                   | 46.3        | 5.0      | 173                   | 44.2        | 4.7      | 103                    | 21.8        | 3.9      |
| <b>Smoking status</b>                    | <i>unknown</i>                       | 11                   | 6%          |          | 12                    | 4%          |          | 1                    | 2%          |          | 4                     | 1%          |          | 2                      | 2%          |          |
|                                          | <i>Never smoker</i>                  | 84                   | 47%         |          | 74                    | 27%         |          | 16                   | 25%         |          | 20                    | 11%         |          | 45                     | 43%         |          |
|                                          | <i>Occasional smoker<sup>s</sup></i> | 1                    | 1%          |          | 3                     | 1%          |          | 1                    | 2%          |          | 1                     | 1%          |          | 2                      | 2%          |          |
|                                          | <i>Former smoker</i>                 | 51                   | 28%         |          | 68                    | 25%         |          | 18                   | 29%         |          | 26                    | 15%         |          | 2                      | 2%          |          |
|                                          | <i>Current smoker</i>                | 33                   | 18%         |          | 119                   | 43%         |          | 27                   | 43%         |          | 126                   | 72%         |          | 53                     | 51%         |          |
|                                          |                                      | <i>N</i>             | <i>mean</i> | <i>s</i> | <i>N</i>              | <i>mean</i> | <i>s</i> | <i>N</i>             | <i>mean</i> | <i>s</i> | <i>N</i>              | <i>mean</i> | <i>s</i> | <i>N</i>               | <i>mean</i> | <i>s</i> |
| <b>Age at first Cigarette Pack years</b> | <i>total</i>                         | 85                   | 21.9        | 9.1      | 190                   | 17.5        | 4.0      | 46                   | 17.9        | 4.2      | 153                   | 16.8        | 3.6      | 57                     | 15.7        | 2.4      |
|                                          | <i>male</i>                          | 48                   | 19.6        | 4.9      | 89                    | 17.2        | 3.7      | 15                   | 18.0        | 2.3      | 91                    | 16.9        | 3.9      | 32                     | 15.5        | 2.4      |
|                                          | <i>female</i>                        | 37                   | 24.9        | 12.0     | 99                    | 17.8        | 4.2      | 31                   | 17.9        | 4.9      | 62                    | 16.5        | 3.1      | 24                     | 16.1        | 2.4      |
|                                          | <i>total</i>                         | 168                  | 10.6        | 16.0     | 253                   | 12.8        | 16.5     | 58                   | 10.9        | 14.9     | 166                   | 21.0        | 15.9     | 98                     | 2.6         | 4.3      |
|                                          | <i>male</i>                          | 64                   | 16.4        | 18.5     | 112                   | 16.0        | 20.2     | 21                   | 16.6        | 21.3     | 93                    | 24.0        | 15.9     | 49                     | 3.1         | 4.6      |
|                                          | <i>female</i>                        | 104                  | 7.0         | 13.0     | 139                   | 10.2        | 12.1     | 37                   | 7.7         | 8.3      | 73                    | 17.1        | 15.1     | 47                     | 2.1         | 3.9      |

<sup>s</sup> Occasional smoker are smokers with less than 1 pack year, having smokes for longer than 1 year. s Standard deviation.

**Table 2.** Number of individuals, trials and experiments.

|                                     | <i>Experiments</i> | <i>Trials</i> | <i>Individuals</i> |
|-------------------------------------|--------------------|---------------|--------------------|
| <i>LC patient</i>                   | 3015               | 156           | 355                |
| <i>Human reference</i> <sup>a</sup> | 1423               | 164           | 1                  |
| <i>Controls</i>                     | 1601               | 66            | 170                |
| <i>Relatives</i>                    | 3977               | 77            | 610                |
| <b>Total</b>                        | <b>10016</b>       | <b>173</b>    | <b>1136</b>        |

<sup>a</sup> in 9 trials no valid measures of the Human reference sample could be achieved.

**Table 3.** Radiation sensitivity (lnOTM and DNA repair capacity)

|                       | <i>Parents</i> |             |          |               | <i>Siblings</i> |             |          |               | <i>Offspring</i> |             |          |               |
|-----------------------|----------------|-------------|----------|---------------|-----------------|-------------|----------|---------------|------------------|-------------|----------|---------------|
|                       | <i>n</i>       | <i>mean</i> | <i>s</i> | <i>median</i> | <i>n</i>        | <i>mean</i> | <i>s</i> | <i>median</i> | <i>n</i>         | <i>mean</i> | <i>s</i> | <i>median</i> |
| <b>lnOTM</b>          |                |             |          |               |                 |             |          |               |                  |             |          |               |
| <i>Basal damage</i>   | 173            | -0.77       | 0.78     | -0.9          | 271             | -0.72       | 0.80     | -0.9          | 100              | -0.79       | 0.66     | -0.9          |
| <i>Initial damage</i> | 178            | 1.58        | 0.40     | 1.6           | 275             | 1.61        | 0.41     | 1.6           | 103              | 1.57        | 0.42     | 1.6           |
| <i>Repair 10 min</i>  | 176            | 0.75        | 0.45     | 0.7           | 274             | 0.75        | 0.46     | 0.7           | 104              | 0.74        | 0.38     | 0.7           |
| <i>Repair 30 min</i>  | 174            | -0.04       | 0.63     | -0.0          | 275             | -0.06       | 0.61     | -0.0          | 104              | -0.20       | 0.68     | -0.1          |
| <i>Repair 60 min</i>  | 175            | -0.48       | 0.68     | -0.5          | 274             | -0.56       | 0.72     | -0.6          | 101              | -0.74       | 0.71     | -0.7          |
| <b>DRC</b>            |                |             |          |               |                 |             |          |               |                  |             |          |               |
| <i>Repair 10 min</i>  | 164            | 0.44        | 0.49     | 0.4           | 270             | 0.45        | 0.76     | 0.4           | 99               | 0.37        | 0.19     | 0.4           |
| <i>Repair 30 min</i>  | 165            | 0.81        | 0.61     | 0.7           | 271             | 0.89        | 1.96     | 0.7           | 99               | 0.76        | 0.32     | 0.7           |
| <i>Repair 60 min</i>  | 165            | 1.01        | 0.55     | 0.9           | 270             | 1.14        | 2.21     | 0.9           | 98               | 0.99        | 0.40     | 0.9           |
|                       | <i>Partner</i> |             |          |               | <i>Probands</i> |             |          |               | <i>total</i>     |             |          |               |
|                       | <i>n</i>       | <i>mean</i> | <i>s</i> | <i>median</i> | <i>n</i>        | <i>mean</i> | <i>s</i> | <i>median</i> | <i>n</i>         | <i>mean</i> | <i>s</i> | <i>median</i> |
| <b>lnOTM</b>          |                |             |          |               |                 |             |          |               |                  |             |          |               |
| <i>Basal damage</i>   | 61             | -0.52       | 0.69     | -0.6          | 160             | -0.79       | 0.81     | -1.0          | 765              | -0.74       | 0.77     | -0.9          |
| <i>Initial damage</i> | 63             | 1.62        | 0.33     | 1.6           | 172             | 1.56        | 0.33     | 1.5           | 791              | 1.59        | 0.39     | 1.6           |
| <i>Repair 10 min</i>  | 63             | 0.90        | 0.35     | 0.9           | 174             | 0.76        | 0.50     | 0.7           | 791              | 0.76        | 0.45     | 0.7           |
| <i>Repair 30 min</i>  | 63             | 0.03        | 0.47     | -0.0          | 169             | -0.12       | 0.66     | -0.1          | 785              | -0.08       | 0.63     | -0.1          |
| <i>Repair 60 min</i>  | 63             | -0.58       | 0.67     | -0.5          | 169             | -0.52       | 0.68     | -0.5          | 782              | -0.56       | 0.70     | -0.6          |
| <b>DRC</b>            |                |             |          |               |                 |             |          |               |                  |             |          |               |
| <i>Repair 10 min</i>  | 61             | 0.35        | 0.36     | 0.4           | 155             | 0.38        | 0.29     | 0.3           | 749              | 0.41        | 0.54     | 0.4           |
| <i>Repair 30 min</i>  | 61             | 0.67        | 1.32     | 0.7           | 155             | 0.81        | 0.65     | 0.7           | 751              | 0.82        | 1.30     | 0.7           |
| <i>Repair 60 min</i>  | 60             | 0.99        | 0.97     | 1.0           | 152             | 1.00        | 0.56     | 0.9           | 745              | 1.05        | 1.42     | 0.9           |

s Standard deviation, DRC.DNA- repair capacity.

**Table 4.** Impact of age, sex and smoking according a generalize additive model.

|                       | <i>p-values</i>     |                            |            |
|-----------------------|---------------------|----------------------------|------------|
|                       | <i>age (Spline)</i> | <i>Pack years (Spline)</i> | <i>sex</i> |
| <i>Basal damage</i>   | * 0.0439            | 0.1983                     | 0.4026     |
| <i>Initial damage</i> | 0.2241              | 0.3073                     | 0.6550     |
| <i>Repair 10 min</i>  | * 0.0286            | 0.2445                     | 0.5157     |
| <i>Repair 30 min</i>  | 0.1227              | 0.1612                     | 0.4401     |
| <i>Repair 60 min</i>  | * 0.0179            | 0.0887                     | 0.5683     |

**Table 5.** Spouse correlation.

| <i>Relationship to index person</i> |                     | <i>Rank correlation</i> |                 | <i>p-value</i> | <i>N</i> |
|-------------------------------------|---------------------|-------------------------|-----------------|----------------|----------|
|                                     |                     |                         | <i>(95%-CI)</i> |                |          |
| <i>Basal damage</i>                 | <i>offspring</i>    | 0.39                    | (0.13–0.60)     | 0.0041         | 50       |
| <i>Basal damage</i>                 | <i>Parents</i>      | 0.01                    | (–0.43–0.45)    | 0.9506         | 20       |
| <i>Basal damage</i>                 | <i>siblings</i>     | 0.13                    | (–0.16–0.40)    | 0.3868         | 48       |
| <i>Basal damage</i>                 | <i>Index-person</i> | 0.09                    | (–0.19–0.36)    | 0.5246         | 51       |
| <i>Initial damage</i>               | <i>offspring</i>    | 0.57                    | (0.35–0.73)     | <0.0001        | 52       |
| <i>Initial damage</i>               | <i>Parents</i>      | 0.21                    | (–0.22–0.56)    | 0.3276         | 24       |
| <i>Initial damage</i>               | <i>siblings</i>     | 0.22                    | (–0.04–0.45)    | 0.0986         | 57       |
| <i>Initial damage</i>               | <i>Index-person</i> | 0.23                    | (–0.02–0.46)    | 0.0661         | 62       |
| <i>Repair 10 min</i>                | <i>offspring</i>    | 0.45                    | (0.20–0.65)     | 0.0008         | 50       |
| <i>Repair 10 min</i>                | <i>Parents</i>      | 0.30                    | (–0.21–0.68)    | 0.2323         | 17       |
| <i>Repair 10 min</i>                | <i>siblings</i>     | 0.22                    | (–0.07–0.48)    | 0.1280         | 47       |
| <i>Repair 10 min</i>                | <i>Index-person</i> | 0.23                    | (–0.06–0.47)    | 0.1112         | 50       |
| <i>Repair 30 min</i>                | <i>offspring</i>    | 0.35                    | (0.08–0.58)     | 0.0106         | 50       |
| <i>Repair 30 min</i>                | <i>Parents</i>      | 0.48                    | (0.02–0.77)     | 0.0368         | 18       |
| <i>Repair 30 min</i>                | <i>siblings</i>     | 0.20                    | (–0.09–0.47)    | 0.1723         | 46       |
| <i>Repair 30 min</i>                | <i>Index-person</i> | 0.19                    | (–0.09–0.45)    | 0.1799         | 49       |
| <i>Repair 60 min</i>                | <i>offspring</i>    | 0.22                    | (–0.06–0.47)    | 0.1233         | 49       |
| <i>Repair 60 min</i>                | <i>Parents</i>      | 0.41                    | (–0.08–0.73)    | 0.0864         | 18       |
| <i>Repair 60 min</i>                | <i>siblings</i>     | 0.22                    | (–0.08–0.48)    | 0.1492         | 45       |
| <i>Repair 60 min</i>                | <i>Index-person</i> | 0.13                    | (–0.16–0.41)    | 0.3674         | 47       |
